# Supplementary material
Source: publisher site journal article supplement (https://www.spandidos-publications.com/384/downloadSupplementary)
Supplement: Supplementary file 1 [file downloadSupplementary]

## Sheet: Sheet1
Table SIV. A sample set of 62 breast carcinomas with the immunohistochemical characteristics pre- and post-chemotherapy.
Sample	Before therapy (ordered categorical)										After therapy (ordered categorical)											Before therapy (dichotomous variables)										After therapy (dichotomous variables)
	ER (%)	PR (%)	HER2/neu	Ki-67 (%)	E-cadherin	N-cadherin	Claudin 1	Claudin 3	Claudin 4	Grade	ER (%)	PR (%)	HER2/neu	Ki-67 (%)	E-cadherin	N-cadherin	Claudin 1	Claudin 3	Claudin 4	Grade	Chevallier	ER	PR	HER2/neu	Ki-67	E-cadherin	N-cadherin	Claudin 1	Claudin 3	Claudin 4	Grade	ER	PR	HER2/neu	Ki-67	E-cadherin	N-cadherin	Claudin 1	Claudin 3	Claudin 4	Grade	Chevallier
1	0	0	0	70	2	0	0	9	9	3	40	10	3	40	2	0	1	6	6	2	3	negative	negative	negative	high	normal	negative	low	high	high	G3	positive	positive	positive	high	normal	negative	low	high	high	G1-2	3
2	100	100	0	10	2	0	0	6	2	3	80	10	0	1	0	0	1	2	2	2	3	positive	positive	negative	low	normal	negative	low	high	low	G3	positive	positive	negative	low	abberant	negative	low	low	low	G1-2	3
3	0	0	0	90	2	0	0	6	6	3	0	0	0	5	2	0	3	4	4	2	3	negative	negative	negative	high	normal	negative	low	high	high	G3	negative	negative	negative	low	normal	negative	high	high	high	G1-2	3
4	90	0	0	10	2	1	0	6	9	3	0	0	1	30	2	1	6	9	9	2	3	positive	negative	negative	low	normal	positive	low	high	high	G3	negative	negative	negative	high	normal	positive	high	high	high	G1-2	3
5	60	20	3	20	1	3	0	9	6	3	80	90	3	70	0	3	0	0	0	3	3	positive	positive	positive	high	abberant	positive	low	high	high	G3	positive	positive	positive	high	abberant	positive	low	low	low	G3	3
6	90	20	1	10	2	1	1	9	9	3	80	20	0	5	2	1	1	9	6	3	3	positive	positive	negative	low	normal	positive	low	high	high	G3	positive	positive	negative	low	normal	positive	low	high	high	G3	3
7	90	20	1	30	2	0	9	9	9	3	90	30	1	10	2	1	9	9	9	3	3	positive	positive	negative	high	normal	negative	high	high	high	G3	positive	positive	negative	low	normal	positive	high	high	high	G3	3
8	70	40	0	40	2	1	0	9	6	3	40	5	0	30	2	0	9	9	6	3	3	positive	positive	negative	high	normal	positive	low	high	high	G3	positive	positive	negative	high	normal	negative	high	high	high	G3	3
9	80	10	0	30	2	0	6	9	9	3	80	90	0	10	2	1	9	9	9	2	3	positive	positive	negative	high	normal	negative	high	high	high	G3	positive	positive	negative	low	normal	positive	high	high	high	G1-2	3
10	0	0	0	90	1	2	6	9	9	3	0	0	0	80	0	0	4	6	9	3	3	negative	negative	negative	high	abberant	positive	high	high	high	G3	negative	negative	negative	high	abberant	negative	high	high	high	G3	3
11	100	100	0	5	2	0	0	4	4	1	80	40	0	5	2	0	3	4	9	1	4	positive	positive	negative	low	normal	negative	low	high	high	G1-2	positive	positive	negative	low	normal	negative	high	high	high	G1-2	4
12	0	0	3	15	1	1	0	4	9	2	5	0	3	50	2	1	3	9	9	3	3	negative	negative	positive	low	abberant	positive	low	high	high	G1-2	positive	negative	positive	high	normal	positive	high	high	high	G3	3
13	5	5	3	5	2	0	0	9	6	2	0	0	3	0	0	0	0	1	1	2	3	positive	positive	positive	low	normal	negative	low	high	high	G1-2	negative	negative	positive	low	abberant	negative	low	low	low	G1-2	3
14	80	90	0	10	2	0	0	2	9	1	90	40	0	5	2	0	2	6	4	1	4	positive	positive	negative	low	normal	negative	low	low	high	G1-2	positive	positive	negative	low	normal	negative	low	high	high	G1-2	4
15	70	20	0	10	1	0	4	4	4	3	30	30	0	10	2	1	1	6	4	3	4	positive	positive	negative	low	abberant	negative	high	high	high	G3	positive	positive	negative	low	normal	positive	low	high	high	G3	4
16	90	30	1	50	2	0	0	4	9	2	50	0	0	5	2	0	0	0	9	2	3	positive	positive	negative	high	normal	negative	low	high	high	G1-2	positive	negative	negative	low	normal	negative	low	low	high	G1-2	3
17	90	90	0	20	2	0	0	4	4	2	70	40	0	5	2	0	0	1	4	2	3	positive	positive	negative	high	normal	negative	low	high	high	G1-2	positive	positive	negative	low	normal	negative	low	low	high	G1-2	3
18	0	0	0	80	1	2	0	4	4	3	0	0	0	80	1	0	1	2	4	3	3	negative	negative	negative	high	abberant	positive	low	high	high	G3	negative	negative	negative	high	abberant	negative	low	low	high	G3	3
19	90	50	0	25	2	1	4	9	6	2	90	0	0	10	2	0	4	6	9	3	3	positive	positive	negative	high	normal	positive	high	high	high	G1-2	positive	negative	negative	low	normal	negative	high	high	high	G3	3
20	100	0	0	30	1	0	1	2	9	2	80	0	0	20	1	0	3	6	9	3	3	positive	negative	negative	high	abberant	negative	low	low	high	G1-2	positive	negative	negative	high	abberant	negative	high	high	high	G3	3
21	0	0	0	30	2	0	4	6	9	3	0	0	0	70	2	0	3	9	6	3	3	negative	negative	negative	high	normal	negative	high	high	high	G3	negative	negative	negative	high	normal	negative	high	high	high	G3	3
22	90	90	0	5	2	0	1	9	9	2	100	0	0	2	2	0	4	9	9	2	3	positive	positive	negative	low	normal	negative	low	high	high	G1-2	positive	negative	negative	low	normal	negative	high	high	high	G1-2	3
23	80	0	0	40	2	0	0	4	6	2	100	0	2	10	2	0	0	9	3	2	3	positive	negative	negative	high	normal	negative	low	high	high	G1-2	positive	negative	positive	low	normal	negative	low	high	high	G1-2	3
24	90	5	0	35	2	0	2	6	9	2	80	0	0	5	2	2	4	6	6	2	3	positive	positive	negative	high	normal	negative	low	high	high	G1-2	positive	negative	negative	low	normal	positive	high	high	high	G1-2	3
25	100	50	0	20	1	0	1	9	6	2	100	20	0	10	1	0	4	6	9	2	3	positive	positive	negative	high	abberant	negative	low	high	high	G1-2	positive	positive	negative	low	abberant	negative	high	high	high	G1-2	3
26	80	70	0	15	1	0	2	9	6	2	95	70	1	10	1	0	1	3	4	2	3	positive	positive	negative	low	abberant	negative	low	high	high	G1-2	positive	positive	negative	low	abberant	negative	low	high	high	G1-2	3
27	0	0	0	50	1	0	6	9	6	2	0	0	0	90	1	0	9	6	9	3	3	negative	negative	negative	high	abberant	negative	high	high	high	G1-2	negative	negative	negative	high	abberant	negative	high	high	high	G3	3
28	0	0	0	40	2	0	2	6	9	2	0	0	0	5	2	0	3	4	9	3	3	negative	negative	negative	high	normal	negative	low	high	high	G1-2	negative	negative	negative	low	normal	negative	high	high	high	G3	3
29	90	50	1	25	2	0	9	9	9	3	90	70	0	5	2	0	6	9	9	2	3	positive	positive	negative	high	normal	negative	high	high	high	G3	positive	positive	negative	low	normal	negative	high	high	high	G1-2	3
30	0	0	3	40	2	1	9	6	6	2	0	0	3	40	2	2	9	6	9	3	3	negative	negative	positive	high	normal	positive	high	high	high	G1-2	negative	negative	positive	high	normal	positive	high	high	high	G3	3
31	0	0	0	30	2	2	6	9	9	2	0	0	0	90	1	2	4	4	9	3	3	negative	negative	negative	high	normal	positive	high	high	high	G1-2	negative	negative	negative	high	abberant	positive	high	high	high	G3	3
32	0	0	0	60	2	2	4	9	9	3	20	0	0	100	2	3	9	9	6	3	3	negative	negative	negative	high	normal	positive	high	high	high	G3	positive	negative	negative	high	normal	positive	high	high	high	G3	3
33	100	60	1	20	2	0	1	2	9	2	80	0	0	10	2	0	1	3	9	2	3	positive	positive	negative	high	normal	negative	low	low	high	G1-2	positive	negative	negative	low	normal	negative	low	high	high	G1-2	3
34	40	0	0	50	1	0	0	4	4	2	100	1	1	1	2	0	6	9	9	2	4	positive	negative	negative	high	abberant	negative	low	high	high	G1-2	positive	positive	negative	low	normal	negative	high	high	high	G1-2	4
35	75	45	1	25	1	1	2	6	9	2	80	20	0	1	1	0	3	4	6	2	3	positive	positive	negative	high	abberant	positive	low	high	high	G1-2	positive	positive	negative	low	abberant	negative	high	high	high	G1-2	3
36	80	70	0	30	2	0	4	6	6	2	15	5	0	5	2	0	0	4	9	2	3	positive	positive	negative	high	normal	negative	high	high	high	G1-2	positive	positive	negative	low	normal	negative	low	high	high	G1-2	3
37	50	0	0	40	1	0	6	4	6	2	60	0	0	40	1	0	3	1	9	2	4	positive	negative	negative	high	abberant	negative	high	high	high	G1-2	positive	negative	negative	high	abberant	negative	high	low	high	G1-2	4
38	90	90	2	40	2	0	1	9	9	1	90	90	2	30	2	0	9	6	9	2	4	positive	positive	positive	high	normal	negative	low	high	high	G1-2	positive	positive	positive	high	normal	negative	high	high	high	G1-2	4
39	100	100	0	25	2	0	0	4	9	2	100	100	0	2	2	0	2	3	6	2	3	positive	positive	negative	high	normal	negative	low	high	high	G1-2	positive	positive	negative	low	normal	negative	low	high	high	G1-2	3
40	70	50	0	25	1	1	1	6	9	2	100	5	0	20	2	0	3	9	6	2	3	positive	positive	negative	high	abberant	positive	low	high	high	G1-2	positive	positive	negative	high	normal	negative	high	high	high	G1-2	3
41	0	0	0	25	2	0	4	4	9	2	20	0	1	5	2	0	4	3	9	2	3	negative	negative	negative	high	normal	negative	high	high	high	G1-2	positive	negative	negative	low	normal	negative	high	high	high	G1-2	3
42	0	0	0	80	2	1	6	6	9	3	0	0	0	70	2	0	9	6	6	3	3	negative	negative	negative	high	normal	positive	high	high	high	G3	negative	negative	negative	high	normal	negative	high	high	high	G3	3
43	40	5	0	1	2	0	6	9	9	1	40	2	1	2	0	0	0	0	1	1	3	positive	positive	negative	low	normal	negative	high	high	high	G1-2	positive	positive	negative	low	abberant	negative	low	low	low	G1-2	3
44	100	90	0	30	2	0	0	3	9	2	80	50	0	20	2	0	0	1	6	3	3	positive	positive	negative	high	normal	negative	low	high	high	G1-2	positive	positive	negative	high	normal	negative	low	low	high	G3	3
45	100	30	0	25	2	0	6	6	6	3	95	10	0	5	2	0	4	6	9	3	3	positive	positive	negative	high	normal	negative	high	high	high	G3	positive	positive	negative	low	normal	negative	high	high	high	G3	3
46	100	95	0	25	2	0	4	9	9	2	100	20	0	5	2	0	9	4	9	2	3	positive	positive	negative	high	normal	negative	high	high	high	G1-2	positive	positive	negative	low	normal	negative	high	high	high	G1-2	3
47	0	0	0	15	2	0	4	9	9	3	0	0	1	25	2	0	4	3	9	3	3	negative	negative	negative	low	normal	negative	high	high	high	G3	negative	negative	negative	high	normal	negative	high	high	high	G3	3
48	100	70	0	5	2	0	2	6	9	2	100	0	0	1	0	0	2	3	9	2	4	positive	positive	negative	low	normal	negative	low	high	high	G1-2	positive	negative	negative	low	abberant	negative	low	high	high	G1-2	4
49	100	80	0	40	2	0	1	9	6	3	80	2	2	10	0	1	1	3	9	3	3	positive	positive	negative	high	normal	negative	low	high	high	G3	positive	positive	positive	low	abberant	positive	low	high	high	G3	3
50	90	70	0	15	2	0	6	9	9	2	90	0	1	15	2	0	6	9	6	2	3	positive	positive	negative	low	normal	negative	high	high	high	G1-2	positive	negative	negative	low	normal	negative	high	high	high	G1-2	3
51	90	0	0	50	2	0	0	9	6	1	100	1	0	25	1	0	1	4	6	1	3	positive	negative	negative	high	normal	negative	low	high	high	G1-2	positive	positive	negative	high	abberant	negative	low	high	high	G1-2	3
52	90	90	0	30	2	0	3	6	6	3	90	80	0	30	2	0	3	4	9	3	4	positive	positive	negative	high	normal	negative	high	high	high	G3	positive	positive	negative	high	normal	negative	high	high	high	G3	4
53	100	100	0	5	2	0	0	3	9	1	80	90	1	5	2	0	0	1	4	1	4	positive	positive	negative	low	normal	negative	low	high	high	G1-2	positive	positive	negative	low	normal	negative	low	low	high	G1-2	4
54	0	0	3	30	2	0	4	9	9	3	0	0	3	5	2	0	1	6	9	2	3	negative	negative	positive	high	normal	negative	high	high	high	G3	negative	negative	positive	low	normal	negative	low	high	high	G1-2	3
55	100	100	1	10	2	0	1	6	6	3	100	90	1	5	1	0	0	6	6	3	3	positive	positive	negative	low	normal	negative	low	high	high	G3	positive	positive	negative	low	abberant	negative	low	high	high	G3	3
56	100	90	2	20	2	0	3	6	6	2	100	10	1	1	2	0	2	4	4	1	3	positive	positive	positive	high	normal	negative	high	high	high	G1-2	positive	positive	negative	low	normal	negative	low	high	high	G1-2	3
57	95	80	1	5	2	0	3	6	9	2	70	40	1	5	2	0	2	3	6	2	4	positive	positive	negative	low	normal	negative	high	high	high	G1-2	positive	positive	negative	low	normal	negative	low	high	high	G1-2	4
58	95	80	1	10	2	0	1	4	9	2	95	2	2	5	2	0	1	3	9	2	4	positive	positive	negative	low	normal	negative	low	high	high	G1-2	positive	positive	positive	low	normal	negative	low	high	high	G1-2	4
59	0	0	3	15	1	0	3	3	9	2	20	1	3	20	1	2	2	2	6	2	4	negative	negative	positive	low	abberant	negative	high	high	high	G1-2	positive	positive	positive	high	abberant	positive	low	low	high	G1-2	4
60	80	30	0	20	1	0	2	9	9	2	100	20	1	50	2	0	3	9	9	3	4	positive	positive	negative	high	abberant	negative	low	high	high	G1-2	positive	positive	negative	high	normal	negative	high	high	high	G3	4
61	90	40	0	40	2	0	1	4	9	2	90	35	1	45	2	0	9	9	9	3	3	positive	positive	negative	high	normal	negative	low	high	high	G1-2	positive	positive	negative	high	normal	negative	high	high	high	G3	3
62	0	0	3	20	2	2	1	6	6	3	0	0	3	30	2	3	2	4	3	3	4	negative	negative	positive	high	normal	positive	low	high	high	G3	negative	negative	positive	high	normal	positive	low	high	high	G3	4
